# Supplementary material for: Role of superhydrophobicity in the biological activity of fibronectin at the cell–material interface
Source: Royal Society of Chemistry journal article supplement (doi:10.1039/c1sm06102j), 2011-01-01
Supplement: c1sm06102j.pdf [file c1sm06102j.pdf]

# Role of Superhydrophobicity in the Biological Activity of Fibronectin at the Cell–Material Interface

José Ballester-Beltrán,<sup>1,†</sup> Patricia Rico,<sup>1,2,†</sup> David Moratal,<sup>1</sup> Wenlong Song,<sup>3,4</sup> João F. Mano,<sup>3,4</sup> and Manuel Salmerón-Sánchez<sup>1,2,5\*</sup>

<sup>1</sup> Center for Biomaterials and Tissue Engineering, Universidad Politécnica de Valencia, Spain. Fax: +34 963877276; Tel: +34 963888930; E-mail: cbiomat@upvnet.upv.es

<sup>2</sup> CIBER de Bioingeniería, Biomateriales y Nanomedicina (CIBER-BBN), Valencia, Spain.

<sup>3</sup> 3B's Research Group – Biomaterials, Biodegradables and Biomimetics, Headquarters of the European Institute of Excellence on Tissue Engineering and Regenerative Medicine, Department of Polymer Engineering, University of Minho, Guimarães, Portugal. Fax: +351 253510900; Tel: +351 253510900; E-mail: info@3bs.uminho.pt

<sup>4</sup> IBB – Institute for Biotechnology and Bioengineering, PT Associated Laboratory, Guimarães, Portugal.

<sup>5</sup> Regenerative Medicine Unit, Centro de Investigación Príncipe Felipe, Valencia, Spain.

## SUPPORTING INFORMATION

Additional data on cell adhesion and fibronectin reorganization is included.

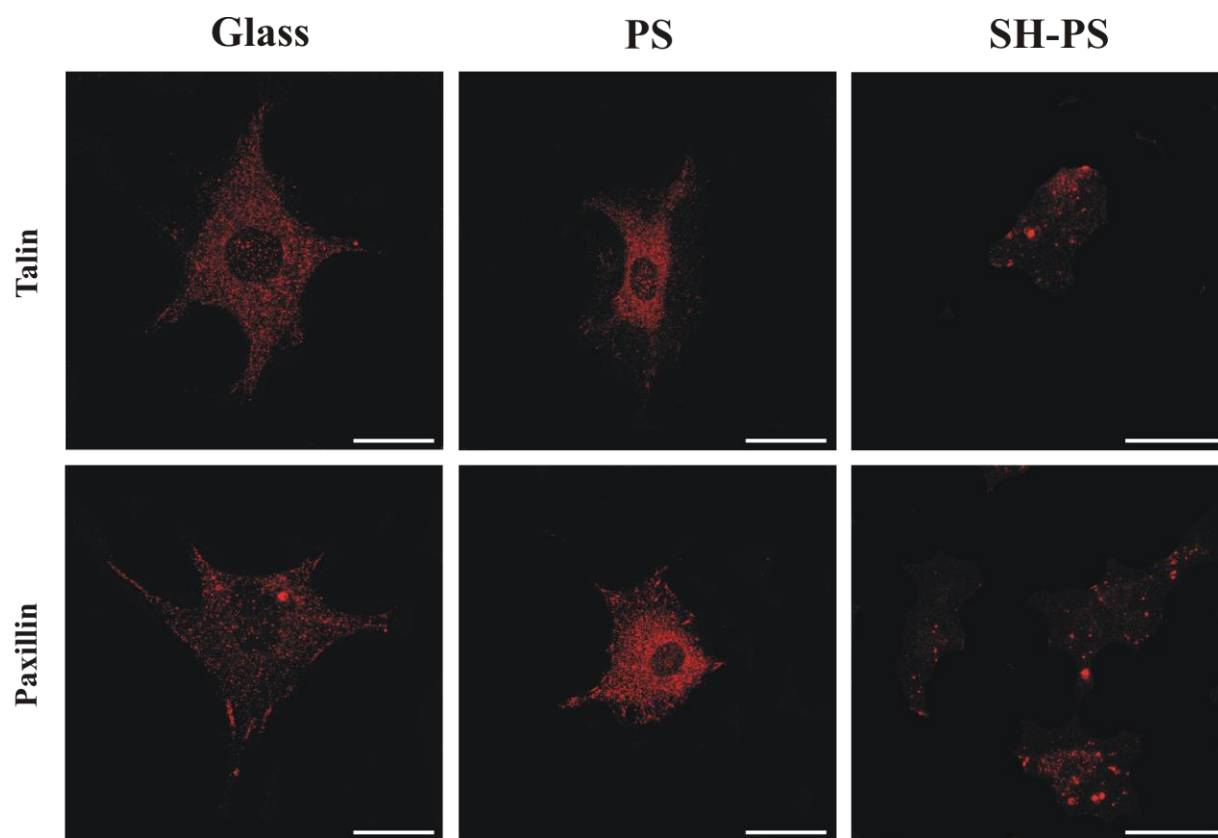

**Supplementary Figure S1.** Focal adhesion proteins talin and paxillin for MC3T3-E1 cells after 3 h on the different FN-coated surfaces. Scale bar is 30  $\mu\text{m}$ .

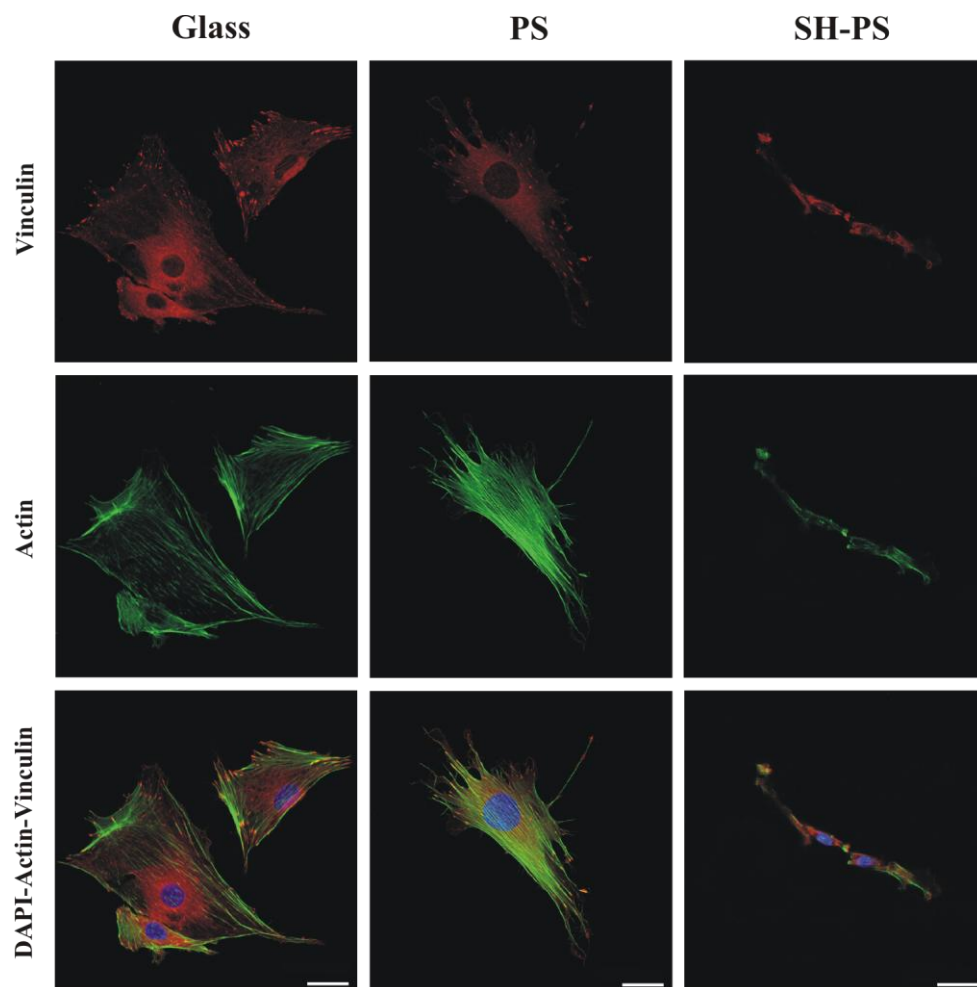

**Supplementary Figure S2.** MC3T3-E1 cells after 1 day on the different FN-coated surfaces. First row/line shows focal adhesion protein vinculin, second one F-actin cytoskeleton. The third one shows superposition including DAPI-stained nuclei. (scale bar 30  $\mu\text{m}$ ).

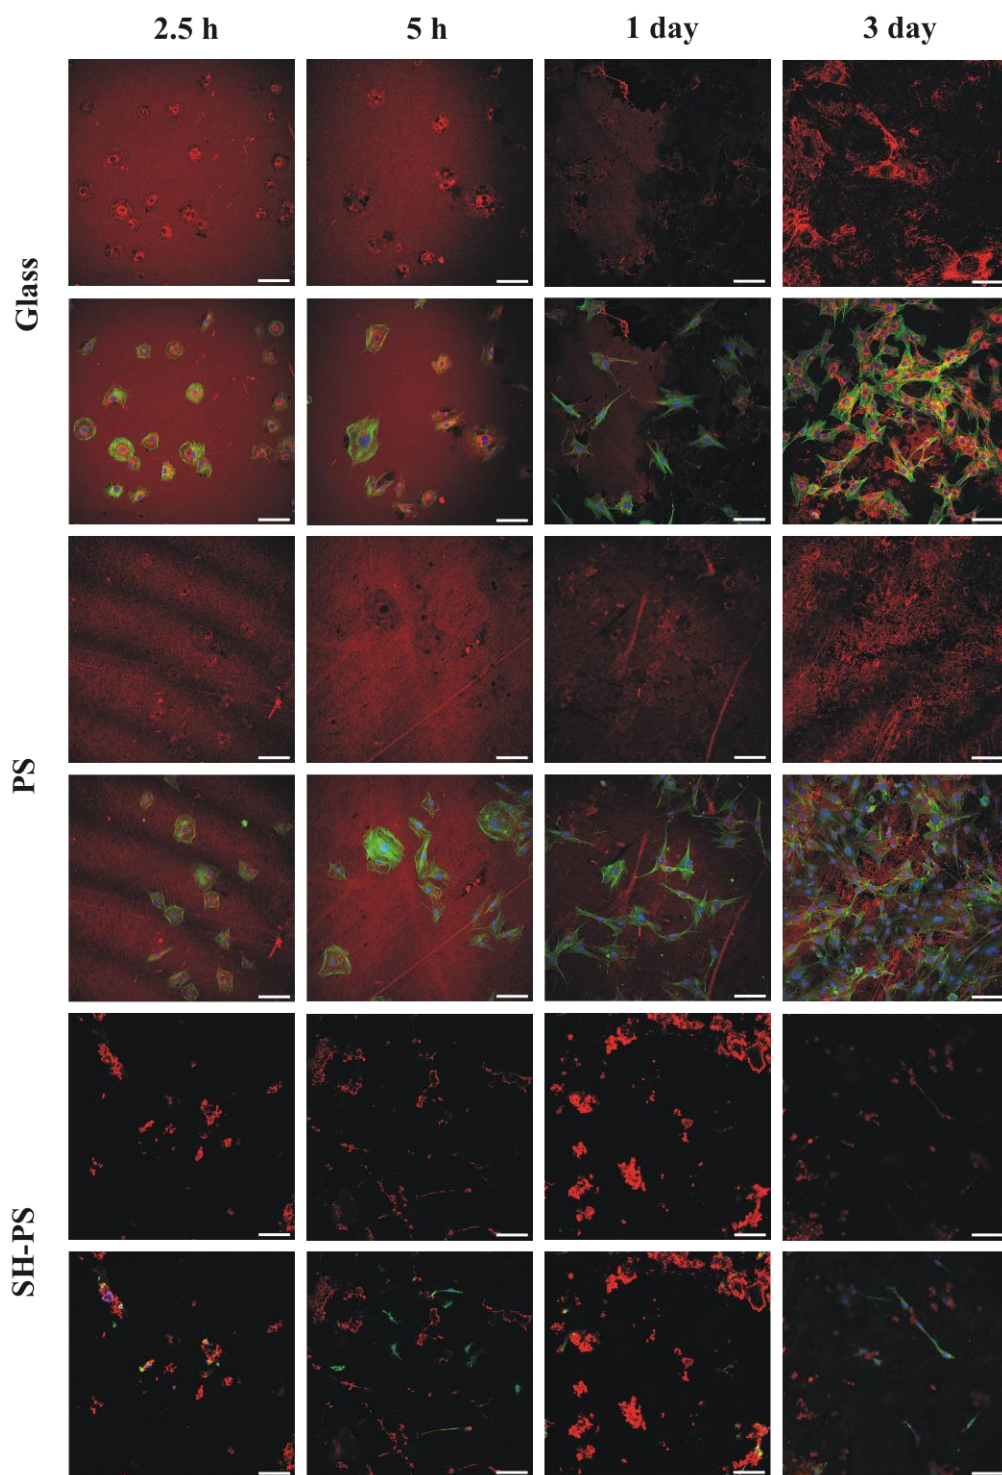

**Supplementary Figure S3.** Cellular reorganization and secretion of FN on the different substrates after 2.5h, 5 h, 1 d and 5 d of culture. Actin cytoskeleton is included in the bottom images for the sake of cell identification.
